# Supplementary material for: Tuning the charge carrier polarity of roll-to-roll gravure printed carbon nanotube-based thin film transistors by an atomic layer deposited alumina nanolayer
Source: Royal Society of Chemistry journal article supplement (doi:10.1039/d3na00286a), 2023-01-01
Supplement: d3na00286a1.pdf [file d3na00286a1.pdf]

Electronic Supplementary Material (ESI) for Nanoscale.  
This journal is © The Royal Society of Chemistry 2023

## Supplementary Information

Wei Zhang<sup>a</sup>, Sagar Shrestha<sup>b</sup>, Sajjan Parajuli<sup>a</sup>, Bijendra Bishow Maskey<sup>a</sup>,  
Jinhwa Park<sup>a</sup>, Hao Yang<sup>a</sup>, Younsu Jung<sup>\*a</sup>, and Gyoujin Cho<sup>\*a,b</sup>

a. Department of Biophysics, Research Engineering Center for R2R-Printed  
Flexible Computer, Sungkyunkwan

University, Suwon-si, 16419, Republic of Korea.

b. Department of Intelligent Healthcare Convergence, Sungkyunkwan  
University, Suwon-si, 16419, Republic of Korea.

Email: isinu7@skku.edu, gcho1004@skku.edu

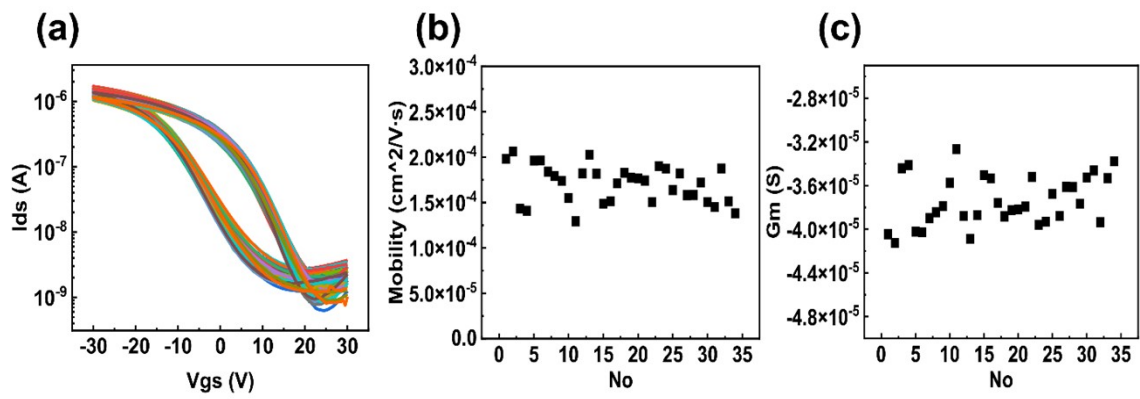

Figure S1: (a) All the transfer curves used in Figure 2, (b) Statistical distribution histograms of mobilities, (c) transconductance ( $g_m$ ) of devices in (a).

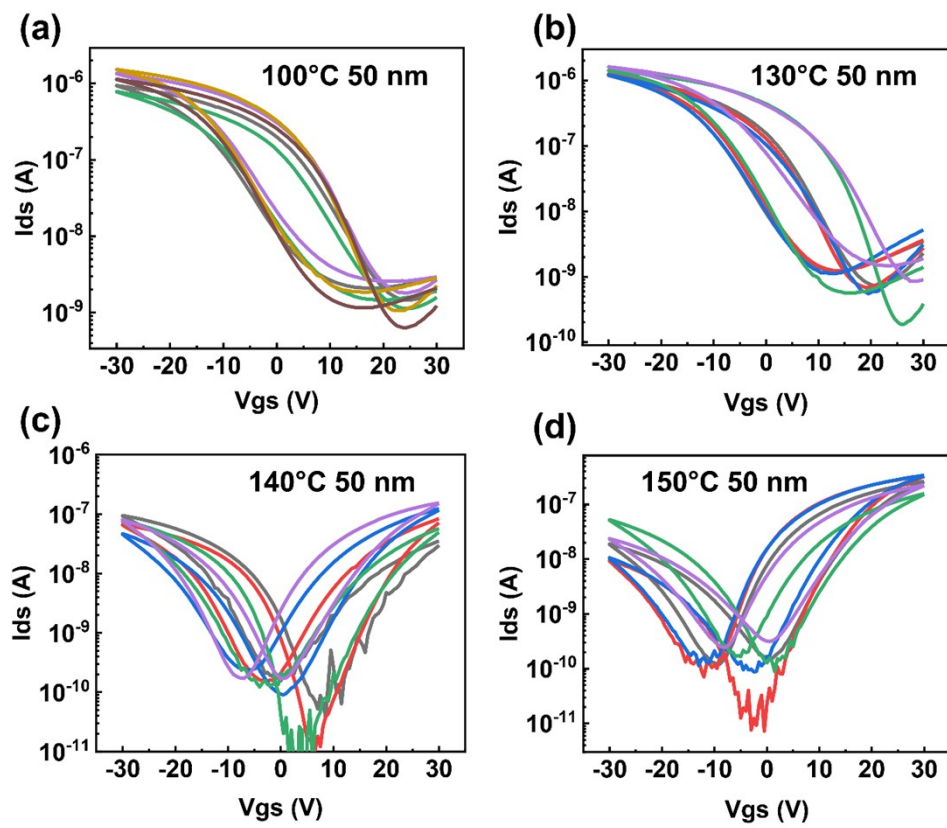

Figure S2: All the transfer characteristics after 50 nm  $\text{Al}_2\text{O}_3$  deposition mentioned in Figure 1 at coating temperatures of (a) 100 °C, (b) 130 °C, (c) 140 °C, and (d) 150 °C, respectively.

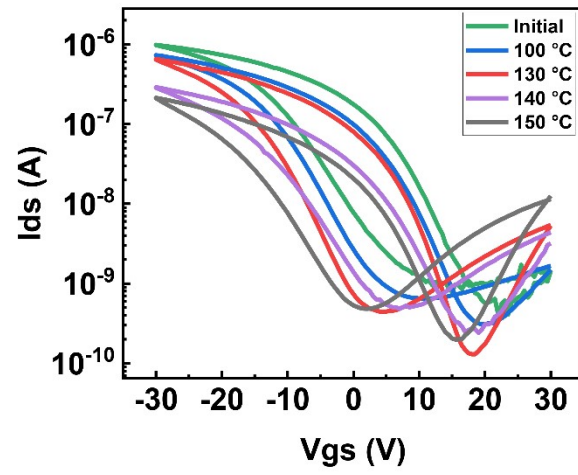

Figure S3: The curing temperature effect to the device performance in ALD chamber.

Table S1. Electrical parameters of the p-type and n-type TFTs fabricated under different ALD conditions.

| DEVICE TYPE | ALD DEPOSITION CONDITION | MOBILITY (CM <sup>2</sup> /VS)               | I <sub>ON</sub> /I <sub>OFF</sub>               | V <sub>TH</sub> (V) | TRANSCONDUCTANCE (S)          |
|-------------|--------------------------|----------------------------------------------|-------------------------------------------------|---------------------|-------------------------------|
| P-type      | 100 °C, 50 nm            | 9.75*10 <sup>-5</sup> -1.97*10 <sup>-4</sup> | 6.41*10 <sup>-2</sup> -<br>1.78*10 <sup>3</sup> | 14.4 ± 1.5          | -3.43 ± 0.87*10 <sup>-5</sup> |
| P-type      | 130 °C, 50 nm            | 1.12*10 <sup>-4</sup> -1.54*10 <sup>-4</sup> | 1.65*10 <sup>-3</sup> -<br>7.67*10 <sup>3</sup> | 15.4 ± 5            | -3.31 ± 0.26*10 <sup>-5</sup> |
| N-type      | 150 °C, 50 nm            | 2.47*10 <sup>-6</sup> -9.45*10 <sup>-6</sup> | 7.02*10 <sup>-2</sup> -<br>3.79*10 <sup>3</sup> | -17.2 ± 1.2         | -6.67 ± 2.15*10 <sup>-6</sup> |
| N-type      | 140 °C, 200 nm           | 1.13*10 <sup>-6</sup> -3.35*10 <sup>-6</sup> | 3.19*10 <sup>-3</sup> -<br>5.26*10 <sup>3</sup> | -21 ± 6             | -4.1 ± 1.1*10 <sup>-5</sup>   |

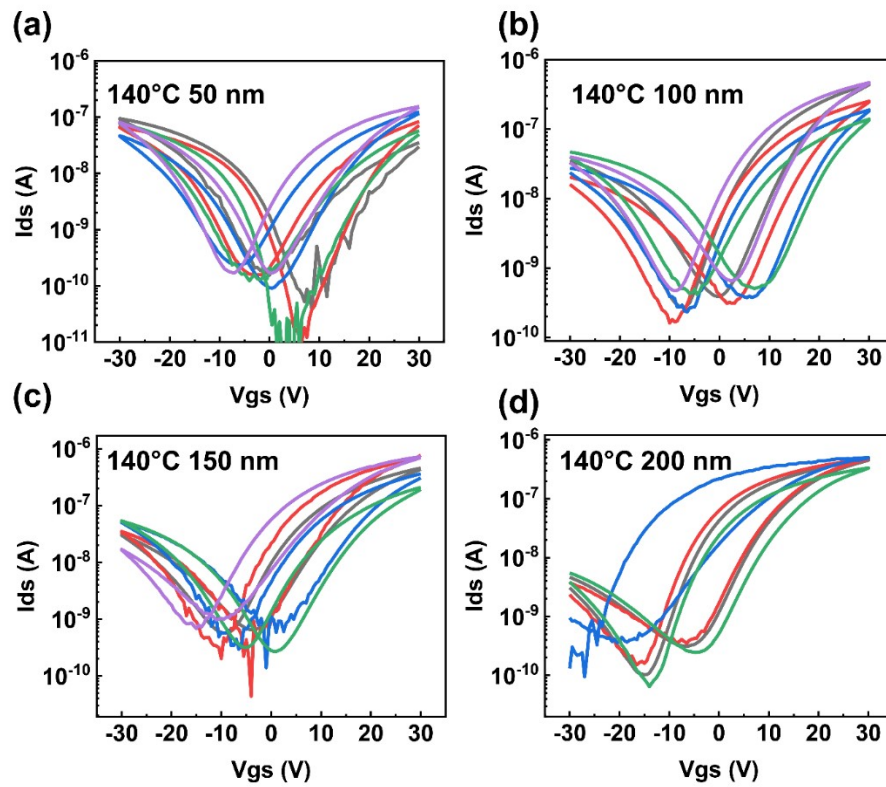

Figure S4: All the transfer characteristics after  $140^\circ\text{C}$   $\text{Al}_2\text{O}_3$  deposition mentioned in Figure 1 at a coating thickness of (a) 50 nm, (b) 100 nm, (c) 150 nm, and (d) 200 nm, respectively.

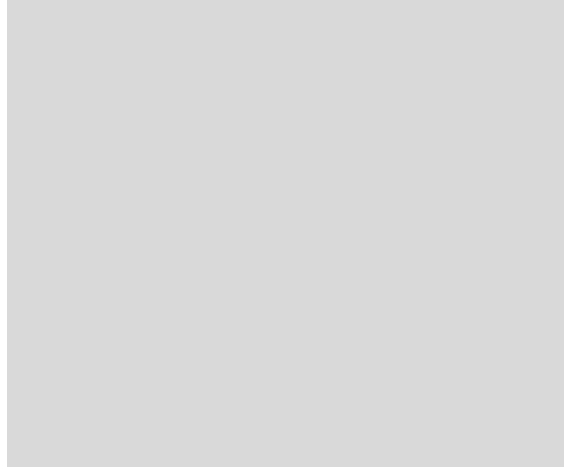

Figure S5: The curing time effect to the device performance in ALD chamber.

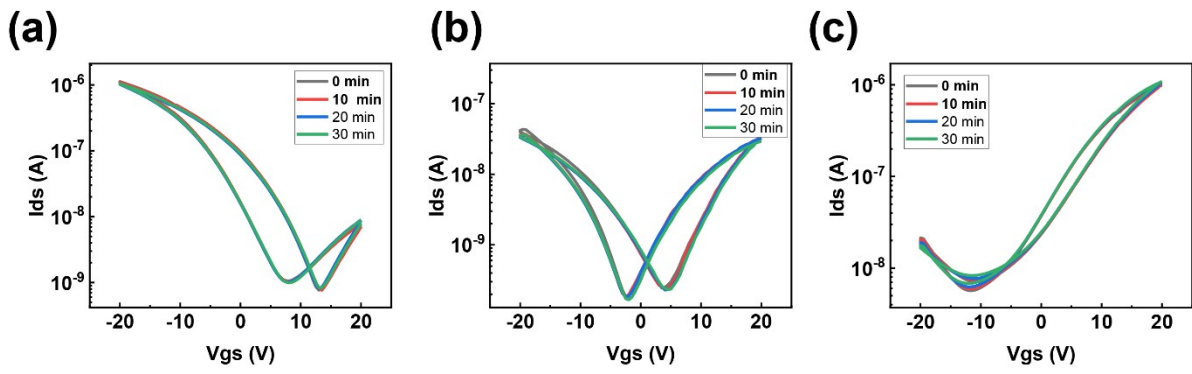

Figure S6. The stability test of (a) p-type, (b) ambipolar type, (c) n-type device under biasing voltage ( $V_{gs}=20$  V).



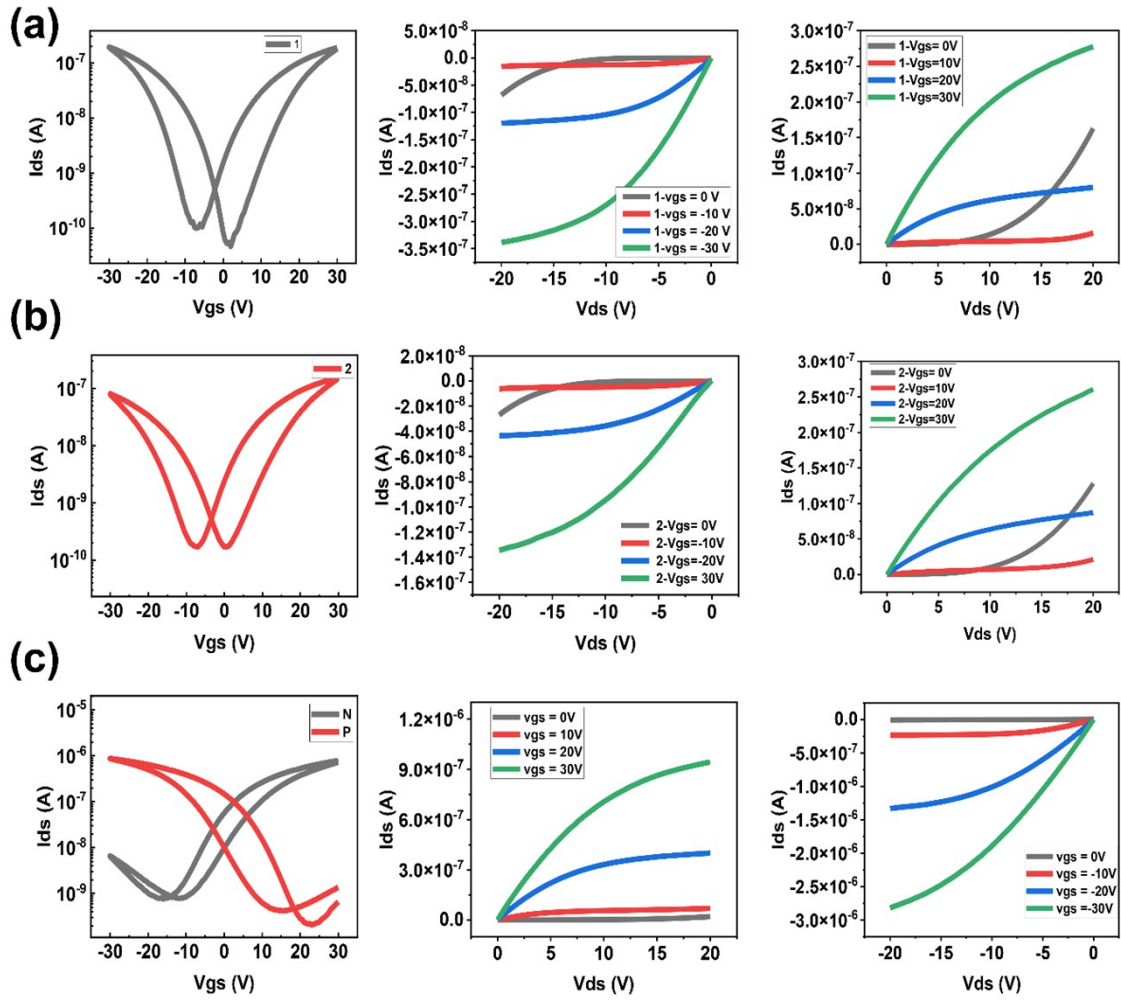

Figure S7: (a) Transfer curve (left) and output curve (middle: p-type, right: n-type) of (a) M1 and M2 in Figure 4 (d). (c) Transfer curve (left) (middle: p-type, right: n-type) in Figure 4 (g).
